# Supplementary material
Source: MDPI journal article supplement (https://www.mdpi.com/1999-4907/10/9/761)
Supplement: s1 [file s1]

### Supplementary A: Statistical tests for development of Q Methodology model of 5 factors

Factor analysis, involving Principal Components Analysis, was performed as it considers the specificity of individual Q sorts, as well as commonality (Webler et al. 2009). As is conventional in factor analysis, factors with Eigenvalues  $>1.00$  were retained for rotation (McKeown & Thomas 1988), with the Eigenvalues reflecting the amount of variation accounted for by each factor. The highest Eigenvalue is 7.94 for Factor 1 and thus this factor represents a common view held by the majority of participants (Table A1). Eigenvalues for factors 2-4 are also  $>1.00$  (2.33, 1.52, 1.39 and 1.15 respectively). While factor 6 is borderline ( $\lambda=1.04$ ), only two participants (P2 and P14) load significantly so it does not constitute a large enough group to merit further examination. Thus, the first five factors, accounting for 65% of the variance, were retained for further analysis (Table A1.1).

**Table S1.** Extracted factors with eigenvalues over 1.

| Factor | Eigenvalue<br>( $\lambda$ ) | As % | Cumul. % |
|--------|-----------------------------|------|----------|
| 1      | 7.94                        | 36.1 | 36.1     |
| 2      | 2.33                        | 10.6 | 46.7     |
| 3      | 1.52                        | 6.9  | 53.6     |
| 4      | 1.39                        | 6.3  | 59.9     |
| 5      | 1.15                        | 5.2  | 65.1     |
| 6      | 1.04                        | 4.7  | 69.9     |

Varimax rotation with an automatic flagging of the sorts was employed in order to minimise researcher bias. Factor loadings, like other correlation coefficients, range from -1.00 to +1.00 and indicate the extent to which each participant's Q sort is similar or dissimilar to the factor. Minimum significant loading at  $p<.01$  is calculated using equation  $2.58(1/\sqrt{n})$  where  $n$  equals the numbers of items in Q sort. Thus, for this sample size (i.e. 48 statements):  $2.58(1/\sqrt{48}) = \pm 0.37$ . Therefore, factor loadings in excess of 0.37 are significant ( $p<.01$ ), although to minimise participants loading on multiple factors, a threshold of  $\pm 0.51$  was adopted.

### Supplementary B: Supporting Information

**Table S2.** Ash dieback Q sorts (Q participants) according to narrative groupings.

| Factor       | Case | Residence (yrs) | Age | Gender | Education  | Context        | Member of Env. group |
|--------------|------|-----------------|-----|--------|------------|----------------|----------------------|
| N1           | P1   | 20+             | 70s | M      | Diploma    | Resident       | No                   |
|              | P4   | 20+             | 20s | M      | Postgrad   | Land M.        | Yes                  |
|              | P6   | 20+             | 50s | M      | Postgrad   | Land M.        | Yes                  |
|              | P8   | 10-20           | 60s | M      | GCSEs      | Resident       | No                   |
| N2           | P2   | 20+             | 40s | M      | Diploma    | Land M.        | No                   |
|              | P5   | 10-20           | 70s | M      | No quals   | Resident       | Yes                  |
|              | P7   | 10-20           | 60s | M      | Prof quals | Resident       | Yes                  |
|              | P13  | 5-10            | 60s | F      | Postgrad   | Woodland owner | Yes                  |
|              | P14  | 10-20           | 40s | M      | Postgrad   | Land M.        | Yes                  |
|              | P16  | 5-10            | 40s | M      | Postgrad   | Land M.        | No                   |
|              | P18  | 20+             | 40s | M      | Degree     | Woodland owner | Yes                  |
| N3           | P22  | 5-10            | 30s | M      | Degree     | Business       | No                   |
|              | P3   | 20+             | 50s | M      | Diploma    | Land M.        | No                   |
|              | P9   | 10-20           | 60s | F      | A levels   | Resident       | No                   |
|              | P16  | 5-10            | 40s | M      | Postgrad   | Land M.        | No                   |
| N4           | P20  | 20+             | 20s | F      | A levels   | Resident       | No                   |
| N5           | P10  | 10-20           | 30s | M      | Degree     | Land M.        | No                   |
|              | P12  | 20+             | 60s | M      | Postgrad   | Resident       | Yes                  |
|              | P15  | 20+             | 30s | M      | Prof quals | Business       | No                   |
|              | P19  | 10-20           | 40s | F      | Postgrad   | Woodland owner | Yes                  |
| No narrative | P11  | 10-20           | 70s | M/F    | Prof quals | Resident       | Yes                  |
|              | P17  | 20+             | 50s | M      | A levels   | Land M.        | Yes                  |
|              | P21  | 20+             | 60s | M      | No quals   | Resident       | No                   |

**Table S3.** Rotated factor matrix with X indicating a defining sort

| Q sort | N1          | N2          | N3          | N4   | N5          |
|--------|-------------|-------------|-------------|------|-------------|
| P1     | <b>.86X</b> | .21         | .04         | -.00 | -.06        |
| P2     | .32         | <b>.54X</b> | .08         | .09  | .26         |
| P3     | .15         | .25         | <b>.79X</b> | -.34 | .05         |
| P4     | <b>.57X</b> | -.01        | .41         | .20  | .41         |
| P5     | .13         | <b>.79X</b> | .15         | .07  | .06         |
| P6     | <b>.70X</b> | .09         | .23         | .03  | .27         |
| P7     | -.02        | <b>.83X</b> | .01         | -.01 | .03         |
| P8     | <b>.74X</b> | -.01        | .21         | .29  | .22         |
| P9     | .12         | .13         | <b>.69X</b> | .45  | .08         |
| P10    | .18         | .48         | .08         | -.08 | <b>.56X</b> |
| P11    | .43         | .47         | .17         | .32  | .37         |
| P12    | .50         | .10         | -.22        | .19  | <b>.70X</b> |
| P13    | .42         | <b>.53X</b> | .19         | .15  | .31         |
| P14    | -.04        | <b>.51X</b> | .32         | .05  | .26         |
| P15    | .24         | .17         | .32         | -.34 | <b>.57X</b> |
| P16    | .39         | <b>.62X</b> | <b>.60X</b> | .01  | .15         |
| P17    | .47         | .12         | .00         | -.18 | .49         |

|                 |     |             |      |             |             |
|-----------------|-----|-------------|------|-------------|-------------|
| P18             | .05 | <b>.63X</b> | .22  | -.24        | -.19        |
| P19             | .07 | -.01        | .24  | .24         | <b>.78X</b> |
| P20             | .15 | -.06        | .06  | <b>.76X</b> | -.01        |
| P21             | .08 | .48         | -.02 | .50         | .39         |
| P22             | .38 | <b>.59X</b> | .32  | -.14        | .34         |
| % expl.<br>Var. | 16  | 18          | 10   | 7           | 14          |
